# Supplementary material for: Antidepressants and suicidal behaviour in late life: a prospective population-based study of use patterns in new users aged 75 and above
Source: PubMed Central journal article supplement (PMC5765190; doi:10.1007/s00228-017-2360-x), 2017-11-04
Supplement: 228_2017_2360_MOESM1_ESM.pdf [file 228_2017_2360_MOESM1_ESM.pdf]

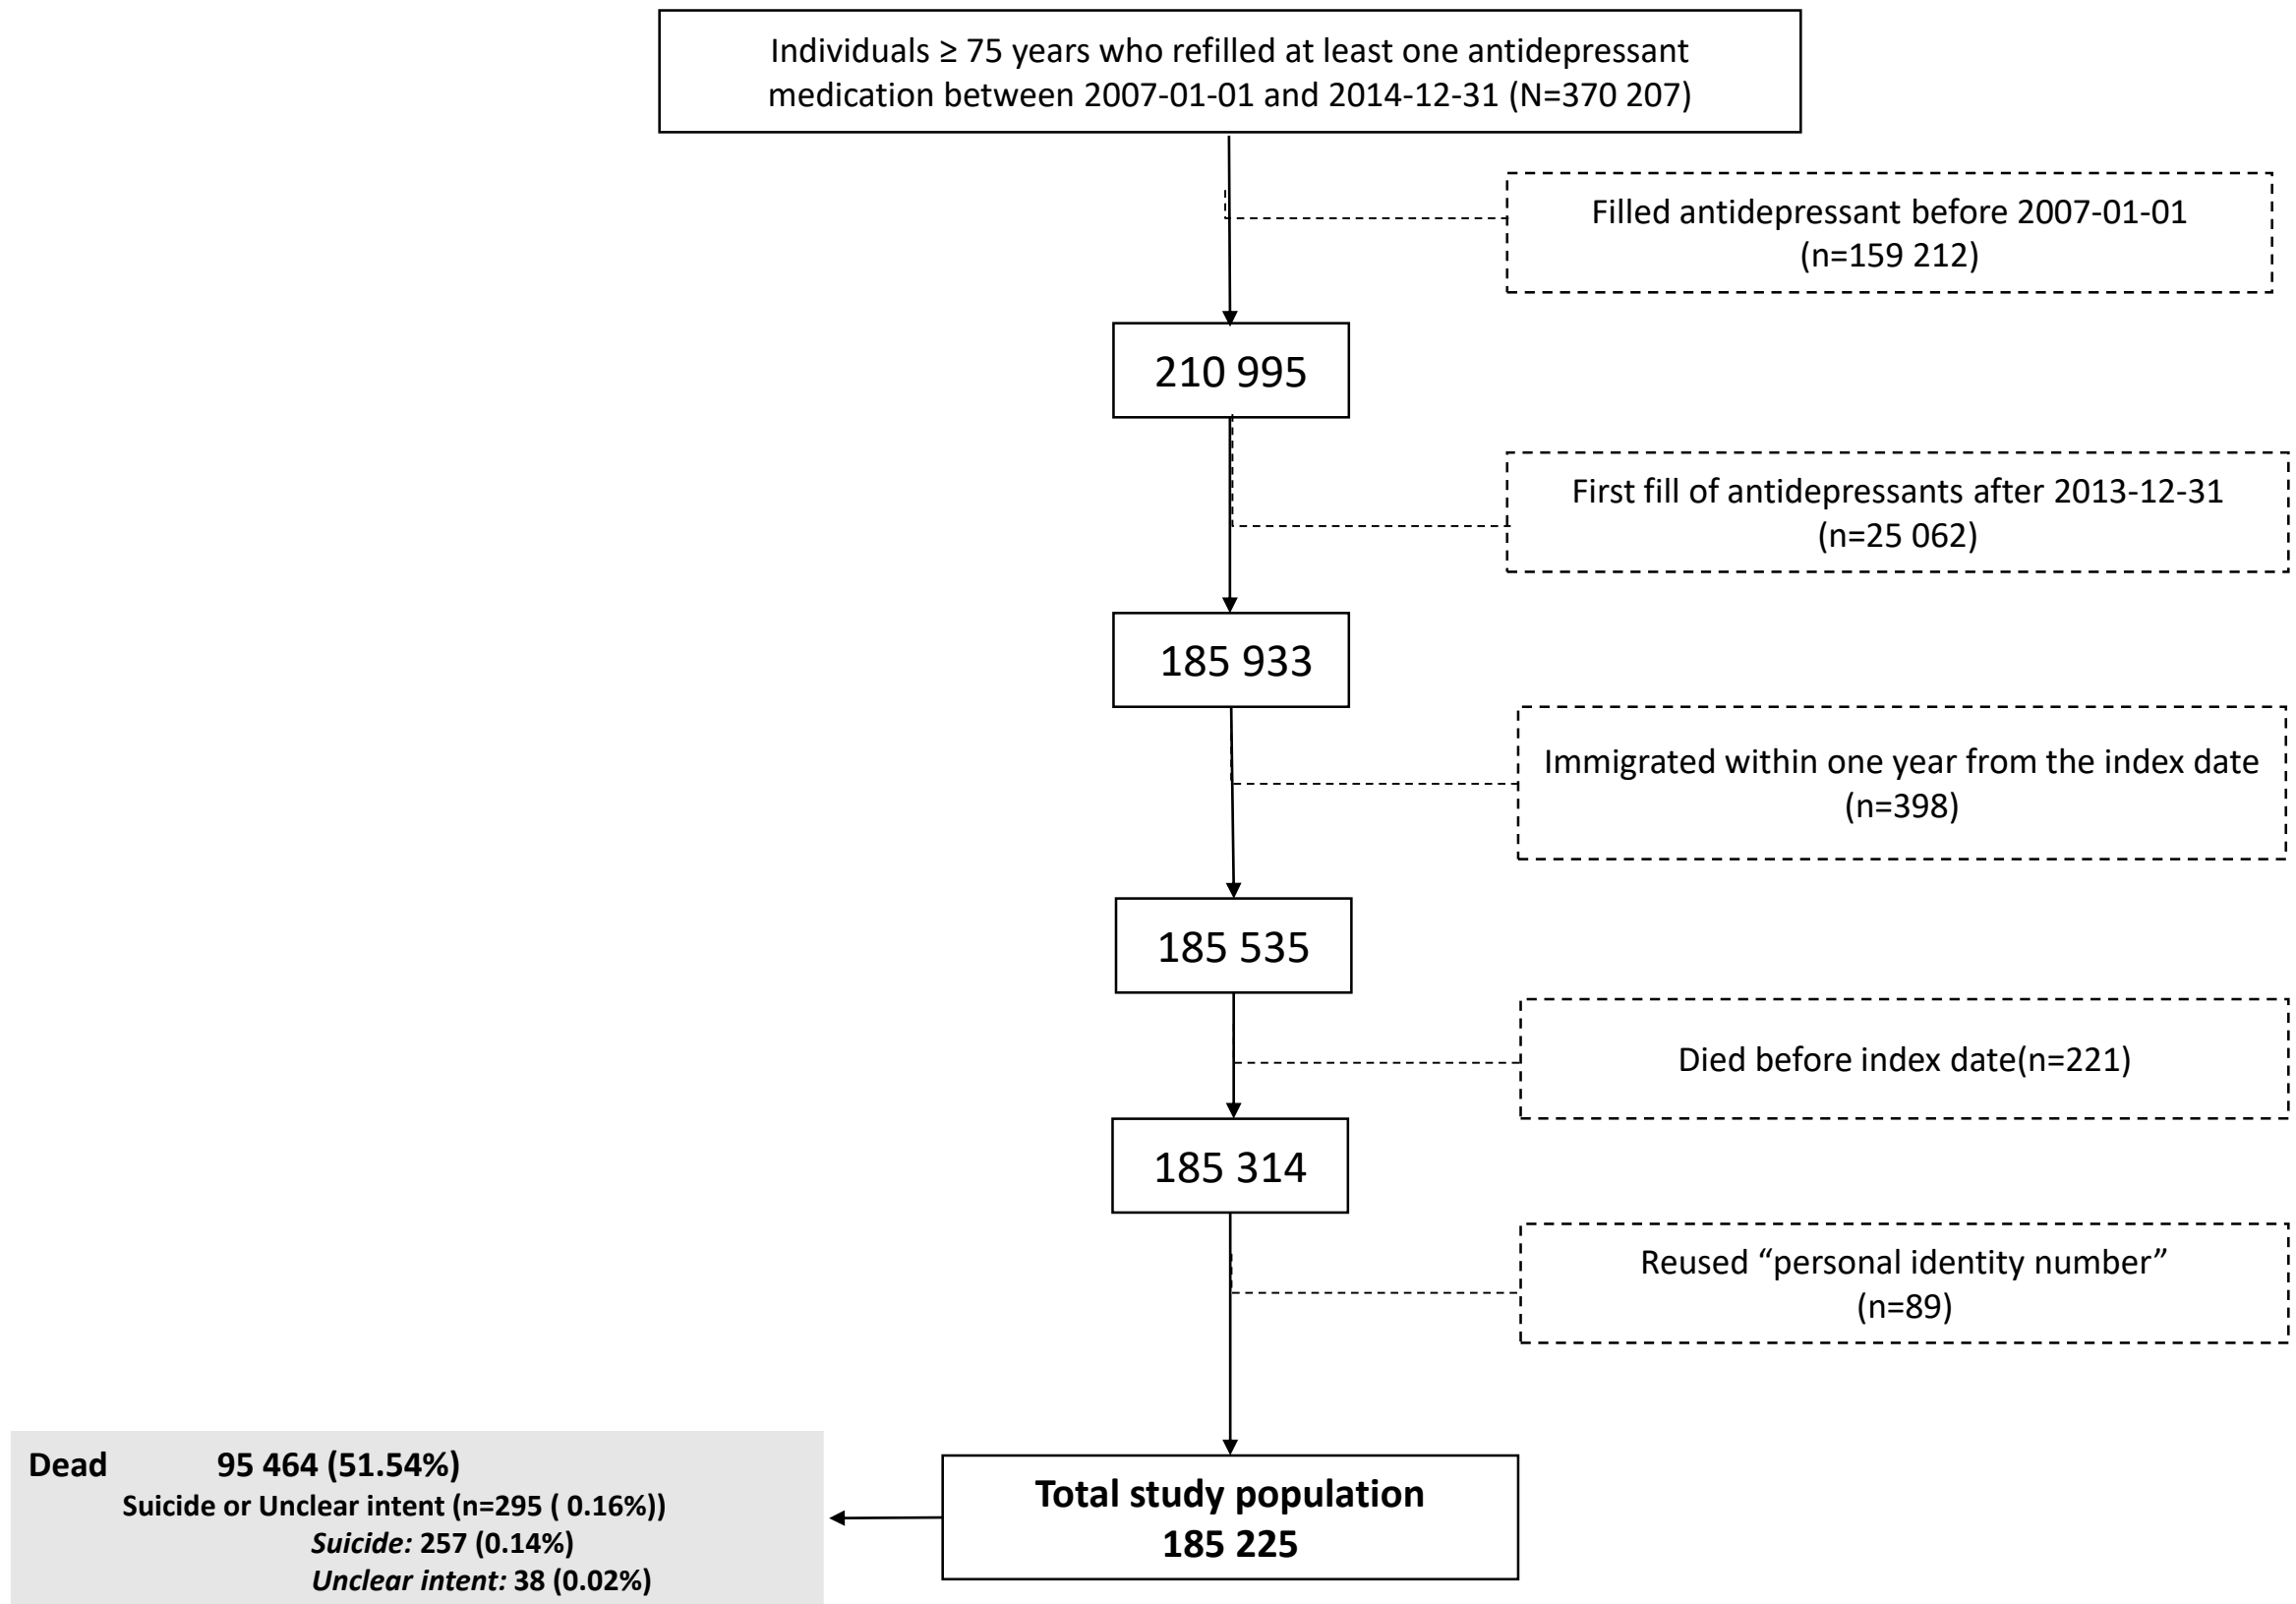

Online Resource 1. Study flow diagram
