# Supplementary material for: Antidepressants and suicidal behaviour in late life: a prospective population-based study of use patterns in new users aged 75 and above
Source: PubMed Central journal article supplement (PMC5765190; doi:10.1007/s00228-017-2360-x), 2017-11-04
Supplement: 228_2017_2360_MOESM2_ESM.pdf [file 228_2017_2360_MOESM2_ESM.pdf]

## Online Resource 2

**Table 1. Crude associations between use patterns of antidepressants and baseline characteristics including index medication**

|                                         |            | Early discontinuation |                | Combination use |                | Switch to another antidepressant |                | Concomitant use of psychotropic medications |                | Antipsychotics |                | Hypnotics |                | Anti-dementia drugs |                | Mood stabilisers |                | Anxiolytics |                | Total  |
|-----------------------------------------|------------|-----------------------|----------------|-----------------|----------------|----------------------------------|----------------|---------------------------------------------|----------------|----------------|----------------|-----------|----------------|---------------------|----------------|------------------|----------------|-------------|----------------|--------|
|                                         |            | N                     | % <sup>a</sup> | N               | % <sup>a</sup> | N                                | % <sup>a</sup> | N                                           | % <sup>a</sup> | N              | % <sup>a</sup> | N         | % <sup>a</sup> | N                   | % <sup>a</sup> | N                | % <sup>a</sup> | N           | % <sup>a</sup> | N      |
| Antidepressant medication at index date | TCA        | 2094                  | 9,8%           | 299             | 1,4%           | 554                              | 2,6%           | 14445                                       | 67,4%          | 1512           | 7,1%           | 11508     | 53,7%          | 997                 | 4,7%           | 630              | 2,9%           | 7696        | 35,9%          | 21440  |
|                                         | SSRI       | 4212                  | 3,6%           | 3760            | 3,2%           | 6199                             | 5,3%           | 92465                                       | 79,1%          | 19820          | 17,0%          | 63563     | 54,4%          | 18159               | 15,5%          | 3574             | 3,1%           | 62121       | 53,2%          | 116870 |
|                                         | SNRI / NRI | 1706                  | 3,6%           | 1749            | 3,7%           | 2092                             | 4,5%           | 38094                                       | 81,3%          | 8588           | 18,3%          | 28378     | 60,5%          | 6297                | 13,4%          | 1255             | 2,7%           | 24967       | 53,3%          | 46883  |
|                                         | Other      | 4                     | 12,5%          | 0               | 0,0%           | 2                                | 6,3%           | 29                                          | 90,6%          | 3              | 9,4%           | 23        | 71,9%          | 7                   | 21,9%          | 3                | 9,4%           | 21          | 65,6%          | 32     |
| Nursing home residence                  | No         | 7885                  | 4,8%           | 5051            | 3,1%           | 7943                             | 4,9%           | 127608                                      | 78,1%          | 24301          | 14,9%          | 92768     | 56,8%          | 21641               | 13,2%          | 4753             | 2,9%           | 82711       | 50,6%          | 163381 |
|                                         | Yes        | 131                   | 0,6%           | 757             | 3,5%           | 904                              | 4,1%           | 17425                                       | 79,8%          | 5622           | 25,7%          | 10704     | 49,0%          | 3819                | 17,5%          | 709              | 3,2%           | 12094       | 55,4%          | 21844  |
| Sex                                     | Male       | 2776                  | 4,1%           | 2220            | 3,3%           | 3072                             | 4,5%           | 50963                                       | 75,4%          | 10948          | 16,2%          | 36674     | 54,2%          | 9210                | 13,6%          | 2374             | 3,5%           | 31745       | 46,9%          | 67619  |
|                                         | Female     | 5240                  | 4,5%           | 3588            | 3,1%           | 5775                             | 4,9%           | 94070                                       | 80,0%          | 18975          | 16,1%          | 66798     | 56,8%          | 16250               | 13,8%          | 3088             | 2,6%           | 63060       | 53,6%          | 117606 |
| Age group                               | 75-79      | 3176                  | 6,0%           | 1627            | 3,1%           | 2743                             | 5,2%           | 40910                                       | 77,0%          | 6920           | 13,0%          | 29609     | 55,7%          | 7476                | 14,1%          | 1944             | 3,7%           | 26130       | 49,2%          | 53126  |
|                                         | 80-84      | 2619                  | 4,7%           | 1799            | 3,2%           | 2815                             | 5,0%           | 44473                                       | 79,1%          | 9100           | 16,2%          | 31744     | 56,5%          | 9096                | 16,2%          | 1781             | 3,2%           | 28853       | 51,3%          | 56223  |
|                                         | 85-89      | 1606                  | 3,4%           | 1541            | 3,2%           | 2134                             | 4,5%           | 37601                                       | 78,9%          | 8578           | 18,0%          | 26641     | 55,9%          | 6653                | 14,0%          | 1241             | 2,6%           | 24814       | 52,0%          | 47678  |
|                                         | ≥90        | 615                   | 2,2%           | 841             | 3,0%           | 1155                             | 4,1%           | 22049                                       | 78,2%          | 5325           | 18,9%          | 15478     | 54,9%          | 2235                | 7,9%           | 496              | 1,8%           | 15008       | 53,2%          | 28198  |

TCA: Tricyclic antidepressant; SSRI: Selective serotonin reuptake inhibitor; SNRI/NRI: Serotonin–noradrenaline reuptake inhibitor/Norepinephrine reuptake inhibitor.

<sup>a</sup> Percentage within each use pattern.
