# Supplementary material for: Antidepressants and suicidal behaviour in late life: a prospective population-based study of use patterns in new users aged 75 and above
Source: PubMed Central journal article supplement (PMC5765190; doi:10.1007/s00228-017-2360-x), 2017-11-04
Supplement: 228_2017_2360_MOESM3_ESM.pdf [file 228_2017_2360_MOESM3_ESM.pdf]

**Online Resource 3. Table 1. Methods of suicide among the study population (N=295)\***

| <b>Method of suicide</b>                      | <b>Number of suicides (%)</b> | <b>Number of suicides among men (%)</b> | <b>Number of suicides among women (%)</b> |
|-----------------------------------------------|-------------------------------|-----------------------------------------|-------------------------------------------|
| <b>Hanging, strangulation and suffocation</b> | 87 (29)                       | 76 (38)                                 | 11 (11)                                   |
| <b>Poisoning</b>                              | 78 (26)                       | 36 (18)                                 | 42 (44)                                   |
| <b>Jumping from a high place</b>              | 36 (12)                       | 23 (12)                                 | 13 (14)                                   |
| <b>Drowning and submersion</b>                | 35 (12)                       | 15 (8)                                  | 20 (21)                                   |
| <b>Firearm</b>                                | 31 (11)                       | 31 (16)                                 | 0 (0)                                     |
| <b>Sharp object</b>                           | 6 (2)                         | 5 (3)                                   | 1 (1)                                     |
| <b>Moving object</b>                          | 5 (2)                         | 4 (2)                                   | 1 (1)                                     |
| <b>Other</b>                                  | 17 (6)                        | 9 (5)                                   | 8 (8)                                     |
| <b>Total</b>                                  | 295                           | 199                                     | 96                                        |

\*Based on the International classification of Diseases (ICD-10) from the Cause of Death Register. Both diagnoses of international self-harm and of undetermined intent were included.

**Online Resource 3. Table 2. Methods of suicide attempt among the study population (N=654)\***

| <b>Method of suicide attempt</b>              | <b>Number of suicide attempts (%)</b> | <b>Number of suicide attempts among men (%)</b> | <b>Number of suicide attempts among women (%)</b> |
|-----------------------------------------------|---------------------------------------|-------------------------------------------------|---------------------------------------------------|
| <b>Poisoning</b>                              | 509 (78)                              | 201 (67)                                        | 308 (87)                                          |
| <b>Sharp object</b>                           | 82 (13)                               | 55 (18)                                         | 27 (8)                                            |
| <b>Hanging, strangulation and suffocation</b> | 19 (3)                                | 16 (5)                                          | 3 (1)                                             |
| <b>Jumping from a high place</b>              | 15 (2)                                | 10 (3)                                          | 5 (1)                                             |
| <b>Drowning and submersion</b>                | 10 (2)                                | 6 (2)                                           | 4 (1)                                             |
| <b>Moving object</b>                          | 4 (1)                                 | 4 (1)                                           | 0 (0)                                             |
| <b>Other</b>                                  | 15 (3)                                | 8 (3)                                           | 7 (2)                                             |
| <b>Total</b>                                  | 654                                   | 300                                             | 354                                               |

\*Based on the International classification of Diseases (ICD-10) from the National Patient Register. Both diagnoses of international self-harm and of undetermined intent were included.
