# Supplementary material for: Antidepressants and suicidal behaviour in late life: a prospective population-based study of use patterns in new users aged 75 and above
Source: PubMed Central journal article supplement (PMC5765190; doi:10.1007/s00228-017-2360-x), 2017-11-04
Supplement: 228_2017_2360_MOESM4_ESM.pdf [file 228_2017_2360_MOESM4_ESM.pdf]

**Online Resource 4. Table 1. Adjusted sub-hazard ratios for suicide by use patterns of antidepressants, stratified by gender**

| Variable                                                                | Men, Suicides = 199                   |        | Women, Suicides = 96                               |       |
|-------------------------------------------------------------------------|---------------------------------------|--------|----------------------------------------------------|-------|
|                                                                         | Adjusted SHR <sup>a</sup><br>(95% CI) | P      | Adjusted SHR <sup>a</sup><br>(95% CI) <sup>a</sup> | P     |
| Early discontinuation <sup>b</sup>                                      | 0.77 (0.36-1.66)                      | 0.51   | 1.15 (0.46-2.84)                                   | 0.77  |
| Combination use of $\geq 2$ antidepressants <sup>c</sup>                | 0.96 (0.47-1.95)                      | 0.90   | 1.84 (0.78-3.38)                                   | 0.17  |
| Switch to another antidepressant <sup>d</sup>                           | 3.03 (1.93-4.76)                      | <0.001 | 1.76 (0.88-3.53)                                   | 0.11  |
| Medication possession ratio of antidepressants $\geq 80\%$ <sup>e</sup> | 0.91 (0.67-1.22)                      | 0.60   | 1.33 (0.84-2.12)                                   | 0.23  |
| Concomitant use of psychotropic medications <sup>f</sup>                |                                       |        |                                                    |       |
| Hypnotics                                                               | 2.13 (1.56-2.93)                      | <0.001 | 2.46 (1.57-3.88)                                   | 0.001 |
| Anxiolytics                                                             | 1.68 (1.24-2.27)                      | <0.001 | 1.15 (0.76-1.76)                                   | 0.51  |
| Antipsychotics                                                          | 0.87 (0.54-1.39)                      | 0.55   | 1.86 (1.07-3.20)                                   | 0.03  |
| Anti-dementia drugs                                                     | 0.37 (0.18-0.76)                      | 0.01   | 0.55 (0.23-1.30)                                   | 0.17  |
| Mood stabilisers <sup>g</sup>                                           | 0.90 (0.37-2.20)                      | 0.68   | -                                                  | -     |

SHR: Sub-hazard ratio

<sup>a</sup> Adjusted for age, sex, suicide attempt within one year preceding the index date, serious depression, use of statins (a proxy of cardiovascular comorbidity), and nursing home residence.

<sup>b</sup> Reference group: those who did not discontinue their treatment within 180 days following the index date

<sup>c</sup> Reference group: those who did not combine two antidepressants within 180 days following the index date

<sup>d</sup> Reference group: those who did not switch to another antidepressant within 180 days following the index date

<sup>e</sup> The proportion of days covered by antidepressant medications during the follow-up period. (Threshold of MPR to define adherence  $\geq 80\%$ )

<sup>f</sup> Reference group: those who did not use the specified psychotropic medication within 90 days following the refill of an antidepressant

<sup>g</sup> The low number of suicides did not allow to conduct the regression analysis among women

**Online Resource 4. Table 2. Adjusted sub-hazard ratios for suicide attempts by use patterns of antidepressants, stratified by gender**

| Variable                                                                | Men, attempts = 300                   |        | Women, attempts = 354                 |        |
|-------------------------------------------------------------------------|---------------------------------------|--------|---------------------------------------|--------|
|                                                                         | Adjusted SHR <sup>a</sup><br>(95% CI) | P      | Adjusted SHR <sup>a</sup><br>(95% CI) | P      |
| Early discontinuation <sup>b</sup>                                      | 1.00 (0.56-1.79)                      | 0.1    | 1.18 (0.71-1.94)                      | 0.52   |
| Combination use of $\geq 2$ antidepressants <sup>c</sup>                | 1.27 (0.74-2.17)                      | 0.38   | 0.63 (0.33-1.22)                      | 0.17   |
| Switch to another antidepressant <sup>d</sup>                           | 1.40 (0.87-2.26)                      | 0.16   | 1.97 (1.38-2.82)                      | <0.001 |
| Medication possession ratio of antidepressants $\geq 80\%$ <sup>e</sup> | 0.82 (0.64-1.05)                      | 0.12   | 0.90 (0.72-1.13)                      | 0.38   |
| Concomitant use of psychotropic medications <sup>f</sup>                |                                       |        |                                       |        |
| <b>Hypnotics</b>                                                        | 2.86 (2.19-3.72)                      | <0.001 | 2.83 (2.20-3.65)                      | <0.001 |
| <b>Anxiolytics</b>                                                      | 1.88 (1.48-2.37)                      | <0.001 | 2.25 (1.78-2.85)                      | <0.001 |
| <b>Antipsychotics</b>                                                   | 1.37 (0.98-1.93)                      | 0.07   | 1.16 (0.83-1.62)                      | 0.38   |
| <b>Anti-dementia drugs</b>                                              | 0.49 (0.29-0.84)                      | 0.01   | 0.34 (0.19-0.62)                      | <0.001 |
| <b>Mood stabilisers</b>                                                 | 0.68 (0.30-1.55)                      | 0.36   | 1.99 (1.18-3.37)                      | 0.01   |

SHR: Sub-hazard ratio

<sup>a</sup> Adjusted for age, sex, suicide attempt within one year preceding the index date, serious depression, use of statins (a proxy of cardiovascular comorbidity), and nursing home residence.

<sup>b</sup> Reference group: those who did not discontinue their treatment within 180 days following the index date

<sup>c</sup> Reference group: those who did not combine two antidepressants within 180 days following the index date

<sup>d</sup> Reference group: those who did not switch to another antidepressant within 180 days following the index date

<sup>e</sup> The proportion of days covered by antidepressant medications during the follow-up period. (Threshold of MPR to define adherence  $\geq 80\%$ )

<sup>f</sup> Reference group: those who did not use the specified psychotropic medication within 90 days following the refill of an antidepressant
