# Supplementary material for: Antidepressants and suicidal behaviour in late life: a prospective population-based study of use patterns in new users aged 75 and above
Source: PubMed Central journal article supplement (PMC5765190; doi:10.1007/s00228-017-2360-x), 2017-11-04
Supplement: 228_2017_2360_MOESM5_ESM.pdf [file 228_2017_2360_MOESM5_ESM.pdf]

**Online Resource 5. Table 1. Cox hazard ratios for suicide and suicide attempts by use patterns of antidepressants\***

| Variable                                                                | Suicide=294               |                                      | Suicide attempts=654      |                                      |
|-------------------------------------------------------------------------|---------------------------|--------------------------------------|---------------------------|--------------------------------------|
|                                                                         | Unadjusted HR<br>(95% CI) | Adjusted HR <sup>a</sup><br>(95% CI) | Unadjusted HR<br>(95% CI) | Adjusted HR <sup>a</sup><br>(95% CI) |
| Early discontinuation <sup>b</sup>                                      | 0.71 (0.40-1.26)          | 0.86 (0.48-1.55)                     | 0.77 (0.53-1.11)          | 1.07 (0.73-1.56)                     |
| Combination use of $\geq 2$ antidepressants <sup>c</sup>                | 2.36 (1.42-3.91)          | 1.21 (0.71-2.06)                     | 1.76 (1.20-2.60)          | 0.90 (0.60-1.35)                     |
| Switch to another antidepressant <sup>d</sup>                           | 3.36 (2.35-4.80)          | 2.49 (1.71-3.62)                     | 2.39 (1.82-3.14)          | 1.71 (1.29-2.27)                     |
| Medication possession ratio of antidepressants $\geq 80\%$ <sup>e</sup> | 1.25 (0.97-1.62)          | 1.05 (0.81-1.37)                     | 0.99 (0.84-1.17)          | 0.86 (0.73-1.02)                     |
| Concomitant use of psychotropic medications <sup>f</sup>                |                           |                                      |                           |                                      |
| Hypnotics                                                               | 2.57 (1.99-3.31)          | 2.21 (1.71-2.87)                     | 3.53 (2.94-4.25)          | 2.81 (2.33-3.39)                     |
| Anxiolytics                                                             | 1.75 (1.38-2.21)          | 1.51 (1.18-1.92)                     | 2.47 (2.11-2.90)          | 2.08 (1.76-2.45)                     |
| Antipsychotics                                                          | 1.51 (1.07-2.11)          | 1.24 (0.87-1.76)                     | 1.67 (1.36-2.11)          | 1.28 (1.02-1.60)                     |
| Anti-dementia drugs                                                     | 0.43 (0.25-0.74)          | 0.43 (0.25-0.74)                     | 0.37 (0.25-0.55)          | 0.40 (0.27-0.59)                     |
| Mood stabilisers                                                        | 0.80 (0.33-1.95)          | 0.66 (0.27-1.60)                     | 1.54 (1.00-2.38)          | 1.30 (0.84-2.02)                     |

SHR: Sub-hazard ratio

\*Due to partially missing data, 210 persons were excluded from the regression analysis

<sup>a</sup> Adjusted for age, sex, suicide attempt within one year preceding the index date, serious depression, use of statins (a proxy of cardiovascular comorbidity), and nursing home residence

<sup>b</sup> Reference group: those who did not discontinue their treatment within 180 days following the index date

<sup>c</sup> Reference group: those who did not combine two antidepressants within 180 days following the index date

<sup>d</sup> Reference group: those who did not switch to another antidepressant within 180 days following the index date

<sup>e</sup> The proportion of days covered by antidepressant medications during the follow-up period. (Threshold of MPR to define adherence  $\geq 80\%$ )

<sup>f</sup> Reference group: those who did not use the specified psychotropic medication within 90 days following the refill of an antidepressant
